# Supplementary material for: Adaptation of a Potyvirus Chimera Increases Its Virulence in a Compatible Host through Changes in HCPro
Source: MDPI journal article supplement (doi:10.3390/plants11172262), 2022-08-30
Supplement: s1 [file s1]

## Local accumulation at 5 dai (RT-qPCR)

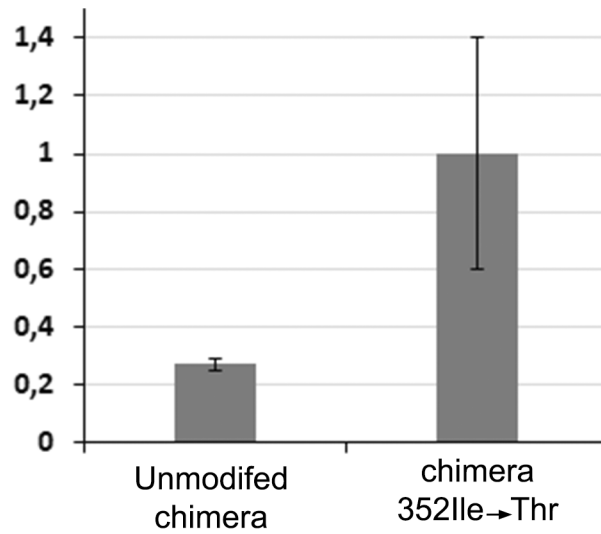

**Figure S1.** RT-qPCR amplification of viral genomic RNA to assess relative accumulation of the unmodified chimera vs. chimera 352Ile→Thr locally in infiltrated discs (within the same leaf) at 5 dai. The samples analyzed are the same than those shown in Figure 6.

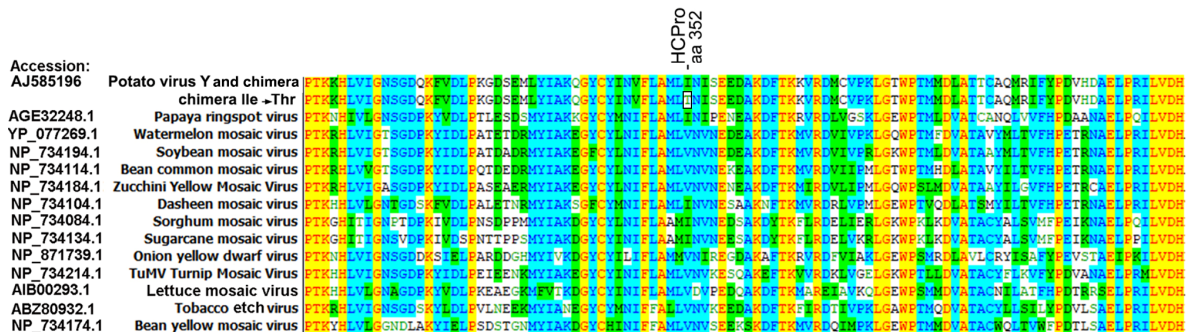

**Figure S2.** Alignment of HCPPro amino acid sequences expressed by several Potyvirus species at PVY HCPPro amino acid position 352, and its surrounding region. The non-conservative substitution Ile→Thr found in the chimera infecting plant A and later incorporated into chimera 352Ile→Thr is unique, absent from the potyvirus sequences compared.
